# Supplementary material for: Graphene-like cobalt selenide nanostructures: template-free solvothermal synthesis, characterization and wastewater treatment
Source: Royal Society of Chemistry journal article supplement (doi:10.1039/c1ce05323j), 2011-01-01
Supplement: c1ce05323j.pdf [file c1ce05323j.pdf]

## Electronic supplementary information

# Graphene-like cobalt selenide nanostructures: template-free solvothermal synthesis, characterization and waster water treatment

Jing-Feng Zhao,<sup>1</sup> Ji-Ming Song,<sup>1\*</sup> Cheng-Cheng Liu,<sup>1</sup> Bian-Hua Liu<sup>2</sup>, He-Lin Niu,<sup>1</sup>  
Chang-Jie Mao,<sup>1</sup> Sheng-Yi Zhang,<sup>1</sup> Yu-Hua Shen<sup>1</sup> and Zhong-Ping Zhang<sup>2\*</sup>

<sup>1</sup> School of Chemistry and Chemical Engineering, Key Laboratory of Functional Inorganic Materials Chemistry of Anhui Province, Anhui University, Hefei, Anhui, 230039, P. R. China.

<sup>2</sup> Institute of Intelligent Machines, Chinese Academy of Sciences, Hefei, Anhui 230031, P. R. China.

\* To whom correspondence should be addressed. E-mail: songjm@ustc.edu.cn; zpzhang@iim.ac.cn.

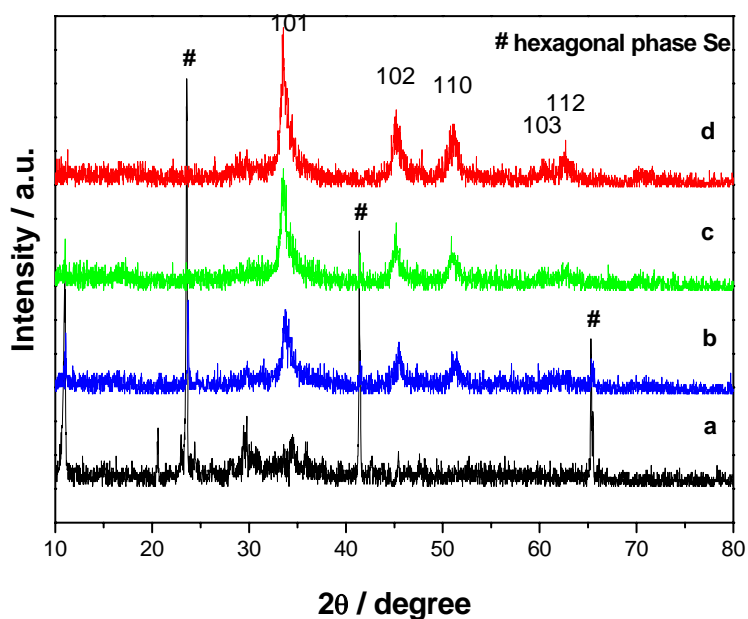

**Figure S1** The evolution of the XRD patterns of the  $\text{Co}_{0.85}\text{Se}$  nanocrystals obtained at different temperatures for 24h: (a) 140 °C; (b) 160 °C; (c) 180 °C; (d) 200 °C.

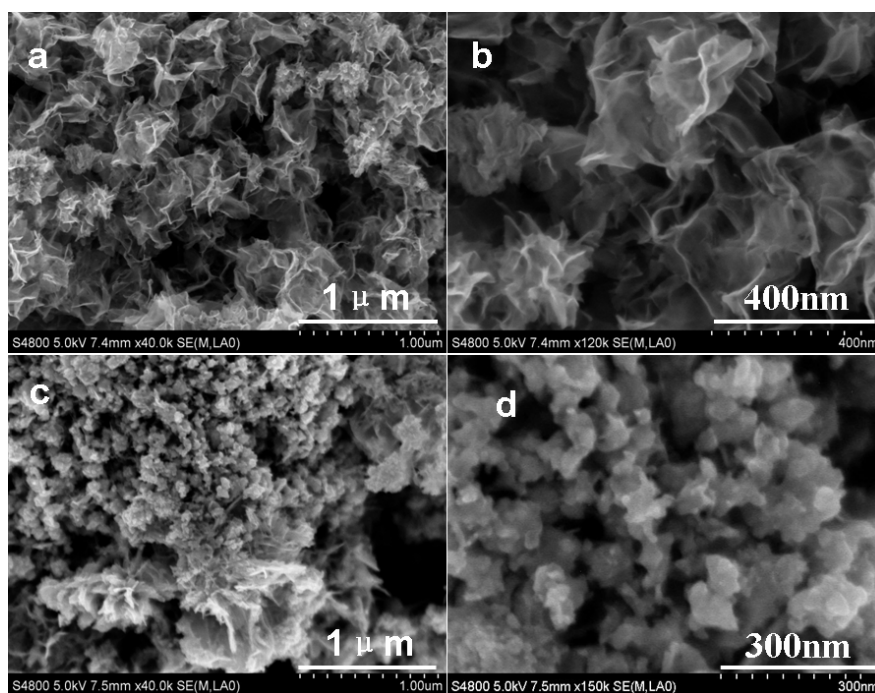

**Figure S2** SEM patterns of the  $\text{Co}_{0.85}\text{Se}$  nanocrystals obtained at different temperatures for 24h: (a, b) 160 °C; (c, d) 200 °C.

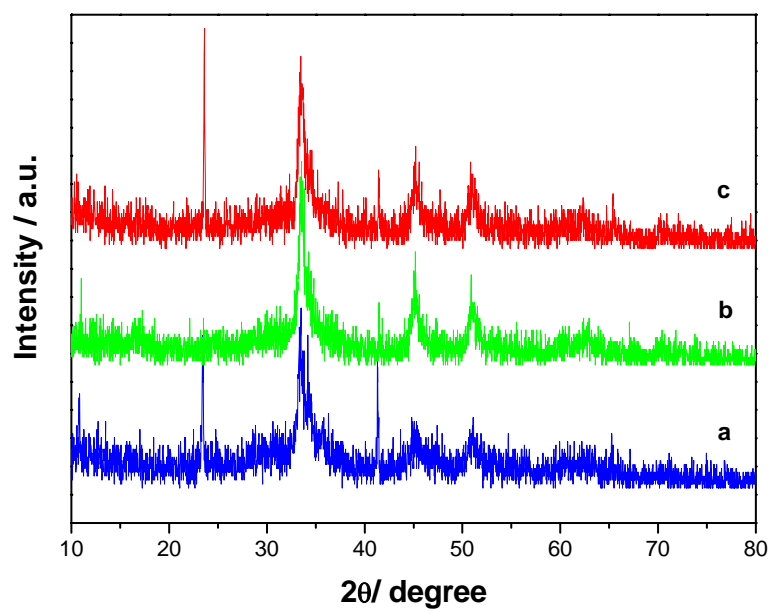

**Figure S3** XRD patterns of  $\text{Co}_{0.85}\text{Se}$  nanocrystals prepared at  $180^\circ\text{C}$  for different reaction time: (a) 12 h; (b) 24 h; (c) 48 h.

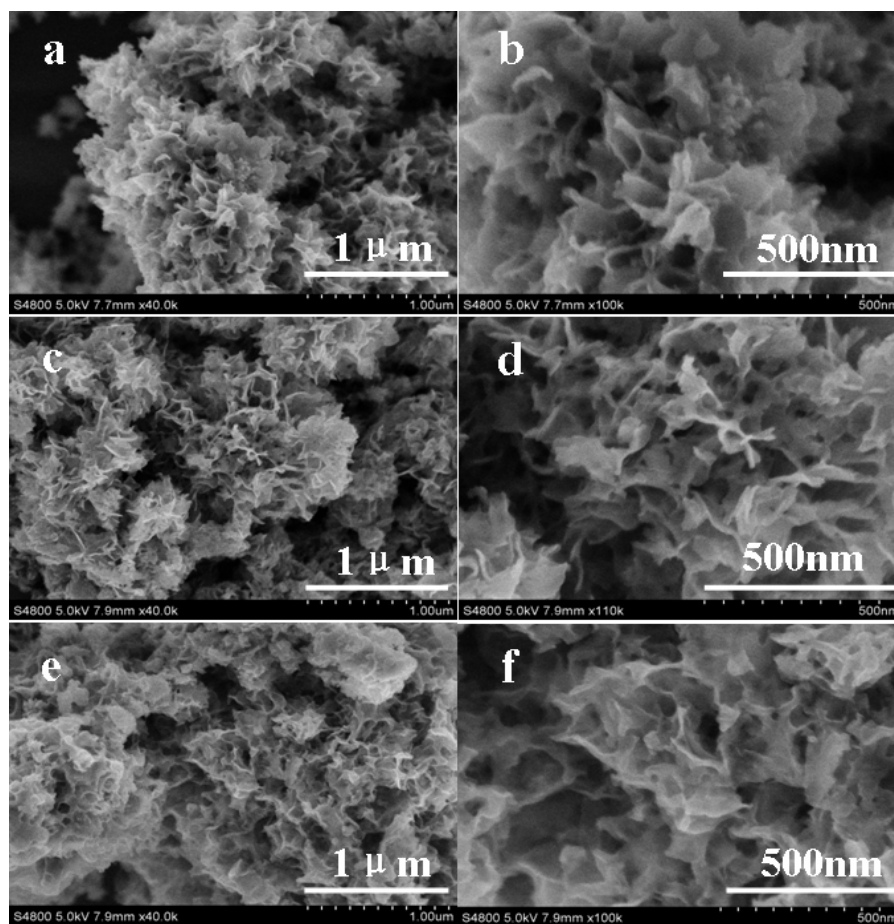

**Figure S4** SEM images of Co<sub>0.85</sub>Se nanostructures prepared at 180 °C, but under different reaction time:(a, b) 12h;  
(c, d) 24h; (e, f) 48h.

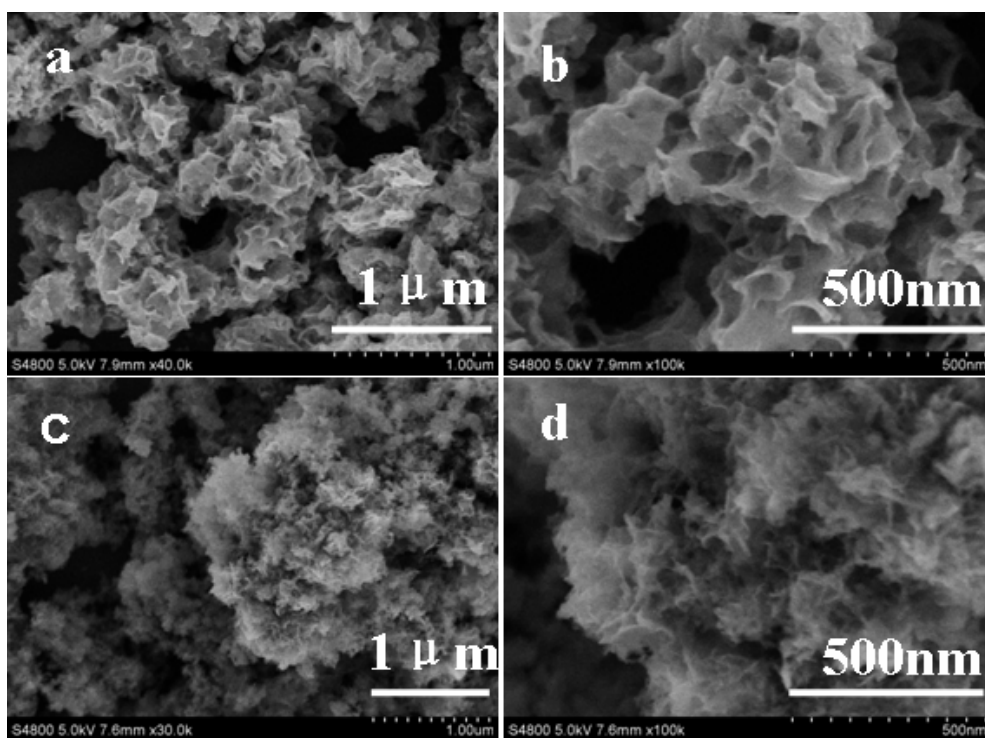

**Figure S5** SEM images of  $\text{Co}_{0.85}\text{Se}$  nanostructures prepared at different molar ratios of  $\text{Co}(\text{NO}_3)_2 \cdot 6\text{H}_2\text{O}$  to  $\text{Na}_2\text{SeO}_3$  ( $n_{\text{Co}}: n_{\text{Se}}$ ): (a, b) 0.85:1; (c, d) 2:1.
